# Supplementary material for: The Influence of Various N-Heterocyclic Carbene Ligands on Activity of Nitro-Activated Olefin Metathesis Catalysts
Source: PubMed Central journal article supplement (PMC7287594; doi:10.3390/molecules25102282), 2020-05-12
Supplement: molecules-25-02282-s001.pdf [file molecules-25-02282-s001.pdf]

**SUPPORTING INFORMARION**

**The influence of various N-heterocyclic carbene  
ligands on activity of nitro-activated olefin  
metathesis catalyst**

Michał Pieczykolan <sup>1,2</sup>, Justyna Czaban <sup>1</sup>, Maura Malinska <sup>2</sup>, Krzysztof  
Woźniak <sup>2</sup>, Reto Dorta <sup>3</sup>, Anna Rybicka <sup>2</sup>, Anna Kajetanowicz <sup>2,\*</sup>, and  
Karol Grela <sup>1,2,\*</sup>

1 Institute of Organic Chemistry Polish Academy of Sciences, Kasprzaka 44/52,  
01-224 Warsaw, Poland

2 Faculty of Chemistry, Biological and Chemical Research Centre, University of  
Warsaw, Żwirki i Wigury 101, 02-089 Warsaw, Poland

3 Department of Chemistry, School of Molecular Sciences, University of Western  
Australia, 35 Stirling Highway, 6009 Perth, Australia

E-mail: karol.grela@gmail.com, a.kajetanowicz@uw.edu.pl

|                                                                          |   |
|--------------------------------------------------------------------------|---|
| General Remarks .....                                                    | 3 |
| Synthesis of ruthenium complexes .....                                   | 3 |
| Synthesis of <b>4a</b> .....                                             | 3 |
| Synthesis of <b>4b</b> .....                                             | 4 |
| Synthesis of <b>4c</b> .....                                             | 4 |
| Synthesis of <b>4d</b> .....                                             | 5 |
| Synthesis of <b>4e</b> .....                                             | 5 |
| Model metathesis reactions .....                                         | 6 |
| General comparative RCM (NMR measurements).....                          | 6 |
| Diethyl cyclopent-3-ene-1,1-dicarboxylate ( <b>7</b> ) .....             | 6 |
| Diethyl 3-methylcyclopent-3-ene-1,1-dicarboxylate ( <b>9</b> ).....      | 6 |
| Comparative RCM experiments (GC measurements).....                       | 6 |
| 3,4-Dimethyl-1-tosyl-2,5-dihydro-1 <i>H</i> -pyrrole ( <b>11</b> ) ..... | 7 |

|                                                                          |    |
|--------------------------------------------------------------------------|----|
| Diethyl 3,4-dimethylcyclopent-3-ene-1,1-dicarboxylate ( <b>13</b> )..... | 7  |
| Comparative ene-yne experiments (GC measurements) .....                  | 7  |
| 2,2-Diphenyl-3-vinyl-2,5-dihydro-furan ( <b>15</b> ).....                | 7  |
| 4-Methyl-2,2-diphenyl-3-vinyl-2,5-dihydro-furan ( <b>17</b> ).....       | 7  |
| X-Ray crystallography.....                                               | 8  |
| NMR spectra.....                                                         | 15 |
| References .....                                                         | 19 |

## General Remarks

All air and moisture sensitive reactions were carried out under argon atmosphere in pre-dried glassware using Schlenk techniques. The catalyst preparation was carried out under argon in pre-dried glassware using Schlenk techniques. The anhydrous solvents were dried by distillation over the following drying agents and were transferred under argon: THF (over sodium benzophenone ketyl and distilled under argon), toluene (Na), n-pentane, n-hexane, n-pentane,  $\text{CH}_2\text{Cl}_2$  ( $\text{CaH}_2$ ). Flash column chromatography was performed using Merck silica gel 60 (230-400 mesh). Analytical thin-layer chromatography (TLC) of all reactions was performed on silica gel 60 F254 TLC plates. Visualization was performed with standard potassium permanganate stains or UV light. NMR spectra were recorded in  $\text{CD}_2\text{Cl}_2$ ; using Varian Mercury 400 MHz, Varian VNMRS 500 MHz and Varian VNMRS 600 MHz spectrometers; chemical shifts ( $\delta$ ) are given in ppm relative to TMS, coupling constants are ( $J$ ) in Hz. Multiplicities are abbreviated as follows: singlet (s), doublet (d), triplet (t), quartet (q), quintet (quint), septet (sept), multiplet (m), and broad (br). IR spectra: wavenumbers are in  $\text{cm}^{-1}$ . MS (FD/FAB) were recorded on GCT Premier spectrometer from Waters. MS (EI, LSIMS) spectra were recorded on AMD 604 Intectra GmbH spectrometer. MS (ESI) spectra were recorded on Mariner Perseptive Biosystems, Inc. GC/MS measurements were done on HP 5890 with HP 5 column. Micro-analyses were provided by Institute of Organic Chemistry, PAS, Warsaw. Model substrates were obtained according to literature procedures.<sup>1</sup> All commercial chemicals were used without further purification.

## Synthesis of ruthenium complexes

### Synthesis of **4a**

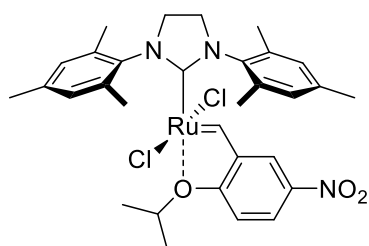

Complex **2a** (220 mg, 0.232 mmol) was dissolved in toluene (7 mL), and 1-isopropoxy-4-nitro-2-(prop-1-en-1-yl)benzene (**5**) (61.6 mg, 0.278 mmol) was added. The mixture was stirred for 5 min,  $\text{CuCl}$  (45.9 mg, 0.474 mmol) was added, and the mixture was heated at 80 °C for 30 minutes. The reaction mixture was cooled to room temperature and concentrated *in vacuo*. From this point, all manipulations were carried out in air with reagent grade solvents. The product was purified by silica gel chromatography ( $\text{AcOEt}/\text{c-hexane} = 1:4$  v/v). The solvent was evaporated under vacuum, and the residue was dissolved in DCM (2 mL). MeOH (5 mL) was added and DCM was slowly removed under vacuum. The precipitated was filtered, washed with MeOH (5 mL), and dried *in vacuo* to afford **4a** as a green microcrystalline solid (130 mg, 83%).  $^1\text{H}$  NMR ( $\text{CD}_2\text{Cl}_2$ , 500 MHz):  $\delta = 16.42$  (s, 1H), 8.46 (dd,  $J = 9.1, 2.5$  Hz, 1H), 7.80 (d,  $J = 2.5$  Hz, 1H), 7.10 (s, 4H), 6.94 (d,  $J = 9.1$  Hz, 1H), 5.01 (sept,  $J = 6.1$  Hz, 1H), 4.22 (s, 4H), 2.46-

2.48 (m, 18H), 1.30 (d,  $J = 6.1$  Hz, 6H);  $^{13}\text{C}$  NMR (125 MHz,  $\text{CD}_2\text{Cl}_2$ ):  $\delta = 289.1, 208.2, 156.8, 150.3, 145.0, 143.5, 139.6, 139.3, 129.8, 124.5, 117.2, 113.3, 78.2, 52.0, 21.3, 21.2, 19.4$ ; IR (KBr):  $\tilde{\nu} = 2924, 2850, 1606, 1521, 1480, 1262, 1093, 918, 745$   $\text{cm}^{-1}$ ; FDMS  $m/z$   $[\text{M}^{\cdot+}]$  671.1.

### Synthesis of 4b

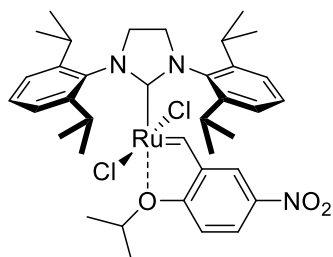

Similar to the preparation of **4a**, **5** (150 mg, 0.68 mmol) was added to solution of complex **2b** (690 mg, 0.68 mmol) in toluene (15 mL). The mixture was stirred for 5 min, and  $\text{CuCl}$  (135 mg, 1.36 mmol) was added. **4b** was obtained as green microcrystalline solid (380 mg, 62%).  $^1\text{H}$  NMR (500 MHz,  $\text{CD}_2\text{Cl}_2$ ):  $\delta = 16.33$  (s, 1H), 8.38 (dd,  $J = 9.0, 2.7$  Hz, 1H), 7.69 (d,  $J = 2.7$  Hz, 1H), 7.58 (t,  $J = 7.7$  Hz, 4H), 7.39 (d,  $J = 7.7$  Hz, 4H), 6.90 (d,  $J = 9.0$  Hz, 1H), 4.99 (m, 1H), 4.20 (s, 4H), 3.56 (m, 4H), 1.40 (d,  $J = 6.1$  Hz, 6H), 1.24 (d,  $J = 6.7$  Hz, 12H);  $^{13}\text{C}$  NMR (125 MHz,  $\text{CD}_2\text{Cl}_2$ ):  $\delta = 283.7, 210.3, 156.6, 149.0, 143.6, 143.0, 136.2, 130.0, 124.4, 124.0, 116.7, 112.8, 77.7, 77.2, 77.0, 76.7, 54.5, 28.8, 26.5, 23.3, 21.7$ ; IR (KBr):  $\tilde{\nu} = 3096, 3069, 2970, 2951, 2927, 2868, 1527, 1341, 1270, 1095, 914, 742$   $\text{cm}^{-1}$ ; FDMS  $m/z$   $[\text{M}^{\cdot+}]$  755.1.

### Synthesis of 4c

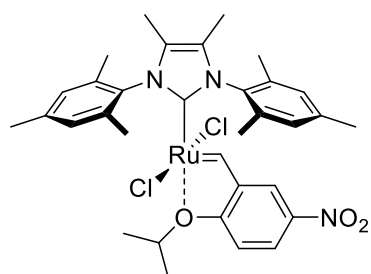

Complex **2c** (500 mg, 0.571 mmol) was dissolved in toluene (11 mL), and 1-isopropoxy-4-nitro-2-(prop-1-en-1-yl)benzene (**5**) (190 mg, 0.856 mmol) was added. The mixture was stirred for 5 min,  $\text{CuCl}$  (113 mg, 1.14 mmol) was added, and the mixture was stirred at  $70$   $^\circ\text{C}$  for 40 minutes. The reaction mixture was cooled to room temperature and concentrated in *vacuo*. From this point, all manipulations were carried out in air with reagent grade solvents. The product was purified by silica gel chromatography (AcOEt/*c*-hexane = 1:5 v/v). The solvent was evaporated under vacuum, and the residue was dissolved in DCM (2 mL). MeOH (5 mL) was added and DCM was slowly removed under vacuum. The precipitated was filtered, washed with MeOH (5 mL), and dried in *vacuo* to afford **4c** as a brownish microcrystalline solid (250 mg, 63%).  $^1\text{H}$  NMR (500 MHz,  $\text{CD}_2\text{Cl}_2$ ):  $\delta = 16.57$  (s, 1H), 8.42 (dd,  $J = 9.0, 2.7$  Hz, 1H), 7.92 (d,  $J = 2.5$  Hz, 1H), 7.14 (s, 4H), 6.89 (d,  $J = 9.0$  Hz, 1H), 4.98 (m, 1H), 2.48 (s, 6H), 2.18 (s, 12H), 1.97 (s, 6H), 1.35 (d,  $J = 6.1$  Hz, 6H);  $^{13}\text{C}$  NMR (125 MHz,  $\text{CD}_2\text{Cl}_2$ ):  $\delta = 287.0, 167.0, 156.4, 145.0, 143.2, 139.7, 138.4, 129.2, 127.8, 123.3, 116.7, 112.7, 77.5, 77.3, 77.0, 76.8, 21.8, 21.1, 21.1, 19.1, 19.1$ ; IR (KBr):  $\tilde{\nu} = 3103, 3084,$

2986, 2969, 2921, 1604, 1571, 1520, 1384, 1337, 1320, 1095, 746, 660  $\text{cm}^{-1}$ ; FDMS  $m/z$   $[\text{M}+\cdot]$  697.1.

### Synthesis of 4d

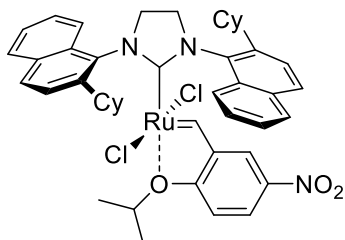

Similar to the preparation of **4c**, **5** (86 mg, 0.389 mmol) was added to solution of complex **1d** (250 mg, 0.243 mmol) in DCM (15 mL). The mixture was stirred for 5 min, and CuCl (48 mg, 0.486 mmol) was added. **4d** was obtained as green microcrystalline solid (180 mg, 87%).  $^1\text{H}$  NMR (500 MHz,  $\text{CD}_2\text{Cl}_2$ ):  $\delta$  = 16.04 (s, 1H), 8.30 (d,  $J$  = 8.1 Hz, 2H), 8.23 (dd,  $J$  = 9.0, 2.7 Hz, 1H), 8.08 (d,  $J$  = 8.6, 2H), 7.95 (d,  $J$  = 7.9 Hz, 2H), 7.68 (d,  $J$  = 8.6 Hz, 2H), 7.60 (td,  $J$  = 6.9, 1.0 Hz, 2H), 7.52 (td,  $J$  = 6.9, 1.0 Hz, 2H), 7.33 (d,  $J$  = 2.5, 1H), 6.71 (d,  $J$  = 9.0 Hz, 1H), 4.77 (m, 1H), 4.48-4.34 (m, 4H), 4.12 (q,  $J$  = 14.2, 7.1 Hz, 1H), 3.11 (s, 2H), 2.16 (s, 1H), 2.04 (s, 2H), 1.98-1.96 (m, 12H), 1.74-1.55 (m, 10H), 1.48-1.37 (m, 4H), 1.25 (t,  $J$  = 7.1 Hz, 4H), 1.09 (d,  $J$  = 6.1 Hz, 2H), 1.01 (d,  $J$  = 6.1 Hz, 2H);  $^{13}\text{C}$  NMR (125 MHz,  $\text{CD}_2\text{Cl}_2$ ):  $\delta$  = 211.5, 156.5, 145.1, 143.7, 142.8, 133.0, 131.6, 129.8, 127.9, 127.0, 126.2, 125.2, 123.9, 116.6, 112.4, 77.5, 77.2, 77.0, 76.7, 60.3, 54.5, 53.4, 39.8, 36.2, 32.5, 31.5, 30.9, 28.2, 27.5, 26.6, 26.3, 25.8, 21.1; IR (KBr):  $\tilde{\nu}$  = 3067, 2925, 2849, 1735, 1523, 1441, 1340, 1267, 1091, 914, 818, 747  $\text{cm}^{-1}$ ; FDMS  $m/z$   $[\text{M}+\cdot]$  851.2.

### Synthesis of 4e

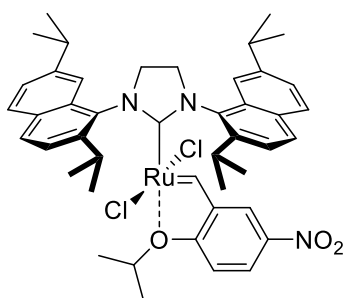

Similar to the preparation of **4c**, **5** (64.4 mg, 0.291 mmol) was added to solution of complex **1e** (200 mg, 0.194 mmol) in DCM (10 mL). The mixture was stirred for 5 min, and CuCl (38.4 mg, 0.388 mmol) was added. **4e** was obtained as green microcrystalline solid (128 mg, 77 %).  $^1\text{H}$  NMR (500 MHz,  $\text{CD}_2\text{Cl}_2$ ):  $\delta$  = 16.39 (s, 1H), 16.21 (s, 1H), 8.21 (dq,  $J$  = 8.9, 2.5 Hz, 1H), 8.05 (d,  $J$  = 8.9 Hz, 2H), 7.95 (s, 1H), 7.86 (dd  $J$  = 8.3, 3.2, 2H), 7.63 (t,  $J$  = 8.9 Hz, 2H), 7.50 (d,  $J$  = 2.5 Hz, 1H), 7.47-7.40 (m, 2H), 6.69 (t,  $J$  = 8.3 Hz, 1H), 4.80-4.70 (m 1H), 4.60 (s, 1H), 4.47 (t,  $J$  = 5.8 Hz, 2H), 3.65 (quint,  $J$  = 13.1, 6.7 Hz, 1H), 3.22 (quint,  $J$  = 13.5, 6.7 Hz, 1H), 3.11 (quint,  $J$  = 13.5, 6.8 Hz, 1H), 1.44-1.36 (m, 25H), 1.13 (d,  $J$  = 5.9 2H), 1.04 (d,  $J$  = 6.0 Hz, 2H), 0.93 (d,  $J$  = 6.0 Hz, 2H);  $^{13}\text{C}$  NMR (125 MHz,  $\text{CD}_2\text{Cl}_2$ ):  $\delta$  = 286.9, 286.6, 211.2, 210.7, 156.5, 147.0, 146.1, 143.9, 143.8, 142.9, 131.7, 131.0, 129.8, 129.7, 127.7, 126.3, 125.5, 123.7, 123.3, 123.2, 122.4, 116.6, 112.5, 112.4, 77.4, 77.2, 77.0, 76.7, 54.0, 34.7, 34.4, 29.2, 29.1, 25.8, 24.0, 23.5, 23.5, 23.3, 22.8, 22.6, 21.1, 21.0, 20.7; IR (KBr):  $\tilde{\nu}$  = 3090, 3058, 2960, 2870, 1604, 1525, 1473, 1340, 1256, 1092, 845  $\text{cm}^{-1}$ ; FDMS  $m/z$   $[\text{M}^+]$  855.3.

## Model metathesis reactions

### General comparative RCM (NMR measurements)

Solutions of dienes **6** and **8** (0.08 mmol) in degassed CD<sub>2</sub>Cl<sub>2</sub> 0.75 mL was placed in NMR tube. Solutions of catalysts 1 mol% was freshly prepared and added to NMR tube in 0.05 mL of CD<sub>2</sub>Cl<sub>2</sub>. Progress of the reactions was monitored by means of NMR spectroscopy and their products were unambiguously identified by comparing with published NMR spectra available in literature.

### Diethyl cyclopent-3-ene-1,1-dicarboxylate (**7**)

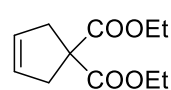

According to general procedure: substrate **6** (19.2 mg, 0.08 mmol) and catalyst **4a** (0.537 mg, 0.0008 mmol, 1 mol%) dissolved in CD<sub>2</sub>Cl<sub>2</sub> (0.8 mL). Colourless oil. <sup>1</sup>H NMR (500 MHz, CDCl<sub>3</sub>) δ = 1.24 (t, *J* = 7,1 Hz, 6H), 3.01 (s, 4H), 4.19 (q, *J* = 7,1 Hz, 4H), 5.61 (s, 2H) ppm. The spectrum correspond to this described in the literature.<sup>2</sup>

| Catalyst | <b>4a</b> | <b>4b</b> | <b>4c</b> | <b>4d</b> | <b>4e</b> |
|----------|-----------|-----------|-----------|-----------|-----------|
| TON      | 95        | 100       | 98        | 99        | 99        |

### Diethyl 3-methylcyclopent-3-ene-1,1-dicarboxylate (**9**)

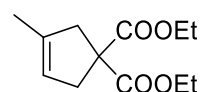

According to general procedure: substrate **8** (20.3 mg, 0.08 mmol) and catalyst **4a** (0.537 mg, 0.0008 mmol, 1 mol%) dissolved in CD<sub>2</sub>Cl<sub>2</sub> (0.8 mL). Colourless oil. <sup>1</sup>H NMR (500 MHz, CDCl<sub>3</sub>) δ = 1.24 (t, *J* = 7,0 Hz, 6H), 1.70 (d, *J* = 1,5 Hz, 3H), 2.93 (s, 2H), 2.96 (s, 2H), 4.19 (q, *J* = 7,0 Hz, 4H), 5.18 (d, *J* = 1,5 Hz, 1H) ppm. The spectrum correspond to this described in the literature.<sup>2</sup>

### Comparative RCM experiments (GC measurements)

Reactions of dienes **10** and **12** in (toluene), [diene] = 0.02 M, 80 °C, 24 h; refer Figures 6-8 and Tables 3-4 were performed as follows. To a stirred solution of diene in toluene (5 mL) placed under argon in a Schlenk tube catalyst **4a-e** (1-5 mol %) and dodecane (used as an internal standard, 0.25–0.30 mmol) was added in a single portion at 40 °C and the reaction mixture was stirred for 24 h at the same temperature. Aliquots (0.25 mL), taken in regular intervals, were quenched immediately with ice-cold solution of ethyl-vinyl ether (0.25 mL, 2 M in CH<sub>2</sub>Cl<sub>2</sub>). Progress of the reactions was monitored by means of GC, using HP 5890 chromatograph with HP 5 column and their products were unambiguously identified by comparing with published NMR spectra available in literature.

### 3,4-Dimethyl-1-tosyl-2,5-dihydro-1H-pyrrole (11)

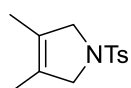

According to general procedure: substrate **10** (140 mg, 0.5 mmol), catalyst **4e** (21.4 mg, 0.025 mmol, 5 mol%), and dodecane (85.2 mg, 0.114 mL, 0.5 mmol) dissolved in toluene (5 mL). Colourless solid.  $^1\text{H NMR}$  (400 MHz,  $\text{CDCl}_3$ )  $\delta$  = 7.72 (d, 2H,  $J$  = 8.0 Hz), 7.32 (d, 2H,  $J$  = 8.0 Hz), 3.97 (s, 4H), 2.43 (s, 3H), 1.54 (s, 6H) ppm. The spectrum correspond to this described in the literature.<sup>3</sup>

### Diethyl 3,4-dimethylcyclopent-3-ene-1,1-dicarboxylate (13)

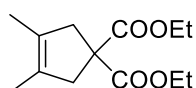

According to general procedure: substrate **12** (134 mg, 0.5 mmol), catalyst **4e** (21.4 mg, 0.025 mmol, 5 mol%), and dodecane (85.2 mg, 0.114 mL, 0.5 mmol) dissolved in toluene (5 mL). Yellowish oil.  $^1\text{H NMR}$  (400 MHz,  $\text{CDCl}_3$ )  $\delta$  = 4.20 (q,  $J$  = 7.12 Hz, 4H), 2.95 (m, 4H), 2.90 (s, 2H), 1.61 (m, 6H), 1.26 (t,  $J$  = 7.12 Hz) ppm. The spectrum correspond to this described in the literature.<sup>4</sup>

### Comparative ene-yne experiments (GC measurements)

Reactions of ene-yne **14** and **16** were performed as follows. To a stirred solutions of ene-yne in toluene (5 mL)  $C = 0.02$  M placed under argon in a Schlenk tubes catalysts **4a-e** (1-5 mol %) and dodecane (used as an internal standard, 0.25–0.30 mmol) was added in a single portion at 40 °C and the reaction mixture was stirred for 24 h at the same temperature. Aliquots (0.25 mL), taken in regular intervals, were quenched immediately with ice-cold solution of ethyl-vinyl ether (0.25 mL, 2 M in  $\text{CH}_2\text{Cl}_2$ ). Progress of the reactions was monitored by means of GC, using HP 5890 chromatograph with HP 5 column and their products were unambiguously identified by comparing with published NMR spectra available in literature.

### 2,2-Diphenyl-3-vinyl-2,5-dihydro-furan (15)

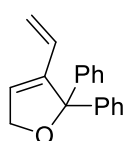

According to general procedure: substrate **14** (124 mg, 0.5 mmol), catalyst **4a** (3.36 mg, 0.005 mmol, 1 mol%), and dodecane (85.2 mg, 0.114 mL, 0.5 mmol) dissolved in toluene (5 mL). Brown oil.  $^1\text{H NMR}$  (500 MHz,  $\text{CDCl}_3$ )  $\delta$  = 4.11 (q,  $J$  = 7.1 Hz, 1H), 5.10 (dd,  $J$  = 11.2, 0.8 Hz, 1H), 5.31 (dd,  $J$  = 17.7, 0.8 Hz, 1H), 6.16–6.18 (m, 1H), 6.20–6.27 (m, 1H), 7.10–7.40 (m, 10H) ppm. The spectrum correspond to this described in the literature.<sup>3</sup>

### 4-Methyl-2,2-diphenyl-3-vinyl-2,5-dihydro-furan (17)

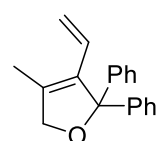

According to general procedure: substrate **16** (131 mg, 0.5 mmol), catalyst **4a** (16.8 mg, 0.025 mmol, 5 mol%), and dodecane (85.2 mg, 0.114 mL, 0.5 mmol) dissolved in toluene (5 mL). Brown oil.  $^1\text{H NMR}$  (400 MHz,  $\text{CDCl}_3$ ):  $\delta$  = 7.37–26

(m, 10H), 6.24 (dd,  $J = 17.7, 11.7$  Hz, 1H), 5.14 (d,  $J = 11.7$  Hz), 5.02 (d,  $J = 17.7$  Hz, 1H), 4.68 (s, 2H), 1.90 (s, 3H) ppm. The spectrum correspond to this described in the literature.<sup>4</sup>

## X-Ray crystallography

For the **3b-3e** samples, the intensities of the diffracted X-ray radiation reflections were measured on a KM4CCD 4-axis diffractometer with graphite-monochromated Mo-K $\alpha$  radiation ( $\lambda = 0.71073\text{\AA}$ ) and equipped with an Oxford Cryosystems nitrogen gas-flow apparatus. The data were corrected for Lorentz and polarization effects. Data reduction and analysis were carried out with the Oxford Diffraction Ltd. suite of programs. The crystals were mounted on Mounted CryoLoop with a droplet of the Pantone-N oil and immediately cooled.

The data collection and processing statistics are reported in Table 1. The structures were solved by direct methods using the SHELXS-97<sup>5</sup> program and refined with the SHELXL<sup>[1]</sup>. A multi-scan absorption correction was applied in the scaling procedure for all structures. After structure solution for **4d** and **4e**, it was found that 20% and 35% of the total cell volume was filled in with disordered solvent molecules. Their positions could not be modelled in terms of atomic sites. From this point on, residual peaks were removed and the solvent region was refined as a diffuse contribution without specific atom positions by using the PLATON<sup>6</sup> module SQUEEZE<sup>7</sup> which subtracts electron density from the void regions by appropriately modifying the diffraction intensities of the overall structure. An electron count over the solvent region provided an estimate for the number of solvent molecules removed from the cell. Applying this procedure led to an improvement in all refinement parameters and a minimization of residuals. The experimental details for **4b-4e** are summarized in Table 1S.

Single-crystal X-ray measurements of the scattered intensities of reflections for **CuCIPCy<sub>3</sub>** samples carried out at 100K were performed using a Bruker AXS KAPPA-APEX II diffractometer equipped with a MoK $\alpha$  rotating anode X-ray source ( $\lambda = 0.71073 \text{ \AA}$ , 50.0 kV, 22.0 mA) monochromatized by multi-layer optics and APEX-II CCD detector and the Oxford Cryostream cooling device. The crystal was mounted on a Mounted CryoLoop with a droplet of Pantone-N oil and immediately cooled. Indexing, integration and initial scaling were performed with SAINT and SADABS software (Bruker AXS, Madison, U.S.A.). The crystals was positioned 50 mm from the CCD camera. 914 frames were measured at  $0.5^\circ$  intervals with a counting time of 10sec. The structures were solved by direct methods and refined using SHELXS-97. Multi-scan absorption corrections were applied in the scaling procedure. The experimental details for **CuCIPCy<sub>3</sub>** are summarized in Table 1S.

The refinement was based on  $F^2$  for all reflections except those with negative intensities. Weighted R factors  $wR$  and all goodness-of-fit  $S$  values were based on  $F^2$ , whereas conventional R factors were based on the amplitudes, with  $F$  set to zero for negative  $F^2$ . The  $F_0^2 > 2\sigma(F_0^2)$  criterion was applied only for R factors calculation was not relevant to the



choice of reflections for the refinement. The R factors based on  $F^2$  are for all structures about twice as large as those based on  $F$ . The hydrogen atoms were located in the idealized geometrical positions, except the hydrogen in the solvent molecules. Scattering factors were taken from Tables 4.2.6.8 and 6.1.1.4 from the International Crystallographic Tables Vol.C.<sup>8</sup> All non-hydrogen atoms were refined anisotropically. All hydrogen atoms were placed in the idealized positions.

**Table 1S. Experimental details for 4b-4e structures.**

|                                                                                       | <b>4b</b>                                                                                                                                                                                                      | <b>4c</b>                                                                                                                                                                                                      | <b>4d</b>                                                                                                                                                                                                      | <b>4e</b>                                                                                                                                                                                                      |
|---------------------------------------------------------------------------------------|----------------------------------------------------------------------------------------------------------------------------------------------------------------------------------------------------------------|----------------------------------------------------------------------------------------------------------------------------------------------------------------------------------------------------------------|----------------------------------------------------------------------------------------------------------------------------------------------------------------------------------------------------------------|----------------------------------------------------------------------------------------------------------------------------------------------------------------------------------------------------------------|
| <b>Crystal data</b>                                                                   |                                                                                                                                                                                                                |                                                                                                                                                                                                                |                                                                                                                                                                                                                |                                                                                                                                                                                                                |
| Chemical formula                                                                      | C <sub>37</sub> H <sub>49</sub> Cl <sub>2</sub> N <sub>3</sub> O <sub>3</sub> Ru                                                                                                                               | C <sub>33</sub> H <sub>39</sub> Cl <sub>2</sub> N <sub>3</sub> O <sub>3</sub> Ru                                                                                                                               | C <sub>45</sub> H <sub>49</sub> Cl <sub>2</sub> N <sub>3</sub> O <sub>3</sub> Ru                                                                                                                               | C <sub>45</sub> H <sub>53</sub> Cl <sub>2</sub> N <sub>3</sub> O <sub>3</sub> Ru                                                                                                                               |
| $M_r$                                                                                 | 755.76                                                                                                                                                                                                         | 697.64                                                                                                                                                                                                         | 851.84                                                                                                                                                                                                         | 855.87                                                                                                                                                                                                         |
| Crystal system,<br>space group                                                        | Monoclinic, $C2/c$                                                                                                                                                                                             | Monoclinic, $P2_1/c$                                                                                                                                                                                           | Triclinic, $P-1$                                                                                                                                                                                               | Monoclinic, $P2_1/n$                                                                                                                                                                                           |
| Temperature (K)                                                                       | 100                                                                                                                                                                                                            | 100                                                                                                                                                                                                            | 100                                                                                                                                                                                                            | 100                                                                                                                                                                                                            |
| $a, b, c$ (Å)                                                                         | 33.087 (2), 12.0080<br>(3), 22.1331 (13)                                                                                                                                                                       | 12.5391 (3), 14.1792<br>(4), 17.9276 (5)                                                                                                                                                                       | 11.3566 (6), 13.0025<br>(6), 15.0637 (6)                                                                                                                                                                       | 16.9146 (6), 29.5454<br>(15), 19.8773 (10)                                                                                                                                                                     |
| $\beta$ (°)                                                                           | 125.595 (9)                                                                                                                                                                                                    | 93.190 (3)                                                                                                                                                                                                     | 100.668 (4), 90.725<br>(4), 94.034 (4)                                                                                                                                                                         | 96.335 (4)                                                                                                                                                                                                     |
| $V$ (Å <sup>3</sup> )                                                                 | 7150.6 (10)                                                                                                                                                                                                    | 3182.49 (15)                                                                                                                                                                                                   | 2179.76 (18)                                                                                                                                                                                                   | 9873.0 (8)                                                                                                                                                                                                     |
| $Z$                                                                                   | 8                                                                                                                                                                                                              | 4                                                                                                                                                                                                              | 2                                                                                                                                                                                                              | 8                                                                                                                                                                                                              |
| Radiation type                                                                        | Mo $K\alpha$ , $\lambda = 0.71073$<br>Å                                                                                                                                                                        | Mo $K\alpha$ , $\lambda = 0.71073$<br>Å                                                                                                                                                                        | Mo $K\alpha$ , $\lambda = 0.71073$<br>Å                                                                                                                                                                        | Mo $K\alpha$ , $\lambda = 0.71073$<br>Å                                                                                                                                                                        |
| $\mu$ (mm <sup>-1</sup> )                                                             | 0.63                                                                                                                                                                                                           | 0.7                                                                                                                                                                                                            | 0.52                                                                                                                                                                                                           | 0.46                                                                                                                                                                                                           |
| Crystal size (mm)                                                                     | 0.30 × 0.10 × 0.10                                                                                                                                                                                             | 0.30 × 0.20 × 0.01                                                                                                                                                                                             | 0.30 × 0.20 × 0.20                                                                                                                                                                                             | 0.20 × 0.10 × 0.05                                                                                                                                                                                             |
| <b>Data collection</b>                                                                |                                                                                                                                                                                                                |                                                                                                                                                                                                                |                                                                                                                                                                                                                |                                                                                                                                                                                                                |
| Diffractometer                                                                        | KUMA4 CCD<br>diffractometer<br>Multi-scan<br><i>CrysAlis PRO</i> ,<br>Agilent<br>Technologies,<br>Version 1.171.35.15<br>(release 03-08-2011<br><i>CrysAlis171 .NET</i> )<br>(compiled Aug 3<br>2011,13:03:54) | KUMA4 CCD<br>diffractometer<br>Multi-scan<br><i>CrysAlis PRO</i> ,<br>Agilent<br>Technologies,<br>Version 1.171.35.15<br>(release 03-08-2011<br><i>CrysAlis171 .NET</i> )<br>(compiled Aug 3<br>2011,13:03:54) | KUMA4 CCD<br>diffractometer<br>Multi-scan<br><i>CrysAlis PRO</i> ,<br>Agilent<br>Technologies,<br>Version 1.171.35.15<br>(release 03-08-2011<br><i>CrysAlis171 .NET</i> )<br>(compiled Aug 3<br>2011,13:03:54) | KUMA4 CCD<br>diffractometer<br>Multi-scan<br><i>CrysAlis PRO</i> ,<br>Agilent<br>Technologies,<br>Version 1.171.35.15<br>(release 03-08-2011<br><i>CrysAlis171 .NET</i> )<br>(compiled Aug 3<br>2011,13:03:54) |
| Absorption<br>correction                                                              | Empirical absorption<br>correction using<br>spherical harmonics,<br>implemented in<br>SCALE3 ABSPACK<br>scaling algorithm.                                                                                     | Empirical absorption<br>correction using<br>spherical harmonics,<br>implemented in<br>SCALE3 ABSPACK<br>scaling algorithm.                                                                                     | Empirical absorption<br>correction using<br>spherical harmonics,<br>implemented in<br>SCALE3 ABSPACK<br>scaling algorithm.                                                                                     | Empirical absorption<br>correction using<br>spherical harmonics,<br>implemented in<br>SCALE3 ABSPACK<br>scaling algorithm.                                                                                     |
| $T_{\min}, T_{\max}$                                                                  | 0.834, 0.940                                                                                                                                                                                                   | 0.818, 0.993                                                                                                                                                                                                   | 0.859, 0.903                                                                                                                                                                                                   | 0.913, 0.977                                                                                                                                                                                                   |
| No. of measured,<br>independent and<br>observed [ $I >$<br>$2\sigma(I)$ ] reflections | 57053, 7247, 6418                                                                                                                                                                                              | 30339, 5808, 4277                                                                                                                                                                                              | 34449, 8274, 7324                                                                                                                                                                                              | 18733, 18733, 10485                                                                                                                                                                                            |
| $R_{\text{int}}$                                                                      | 0.037                                                                                                                                                                                                          | 0.078                                                                                                                                                                                                          | 0.044                                                                                                                                                                                                          | 0                                                                                                                                                                                                              |
| $(\sin \theta/\lambda)_{\text{max}}$ (Å <sup>-1</sup> )                               | 0.625                                                                                                                                                                                                          | 0.602                                                                                                                                                                                                          | 0.61                                                                                                                                                                                                           | 0.61                                                                                                                                                                                                           |
| <b>Refinement</b>                                                                     |                                                                                                                                                                                                                |                                                                                                                                                                                                                |                                                                                                                                                                                                                |                                                                                                                                                                                                                |
| $R[F^2 > 2\sigma(F^2)],$<br>$wR(F^2), S$                                              | 0.046, 0.118, 1.37                                                                                                                                                                                             | 0.041, 0.094, 1.07                                                                                                                                                                                             | 0.036, 0.115, 1.16                                                                                                                                                                                             | 0.112, 0.326, 1.11                                                                                                                                                                                             |
| No. of reflections                                                                    | 7247                                                                                                                                                                                                           | 5808                                                                                                                                                                                                           | 8274                                                                                                                                                                                                           | 18733                                                                                                                                                                                                          |
| No. of parameters                                                                     | 420                                                                                                                                                                                                            | 389                                                                                                                                                                                                            | 488                                                                                                                                                                                                            | 973                                                                                                                                                                                                            |
| No. of restraints                                                                     | 2                                                                                                                                                                                                              | 0                                                                                                                                                                                                              | 0                                                                                                                                                                                                              | 5                                                                                                                                                                                                              |

| H-atom treatment                                                | H-atom parameters constrained | H-atom parameters constrained | H-atom parameters constrained | H-atom parameters constrained |
|-----------------------------------------------------------------|-------------------------------|-------------------------------|-------------------------------|-------------------------------|
| $\Delta\rho_{\max}, \Delta\rho_{\min}$ ( $e \text{ \AA}^{-3}$ ) | 2.31, -2.91                   | 0.46, -0.70                   | 0.49, -0.96                   | 1.71, -1.17                   |

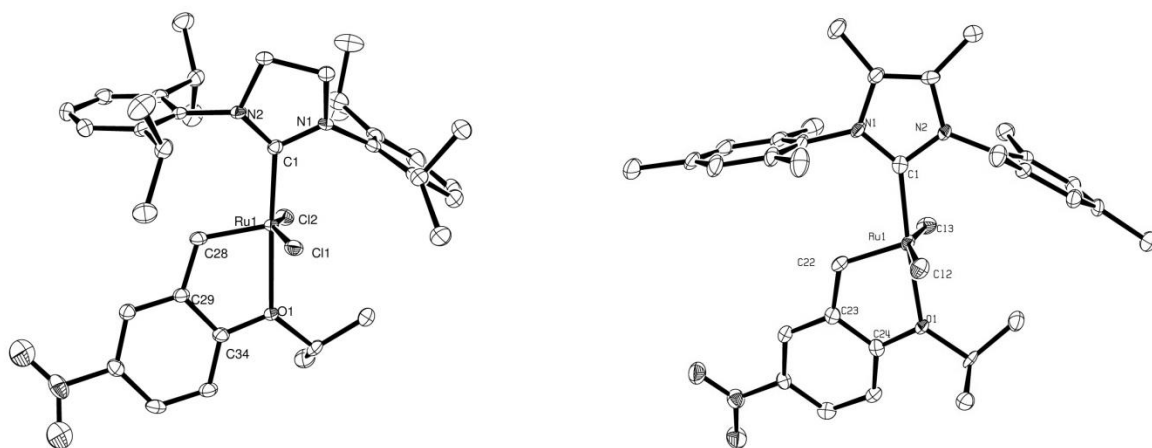

**Figure 1S.** Atomic Displacement Parameters (ADPs) and the labeling of atoms in **4b** and **4c**. Thermal ellipsoids are shown at the 50% probability level. Hydrogen atoms omitted for clarity.

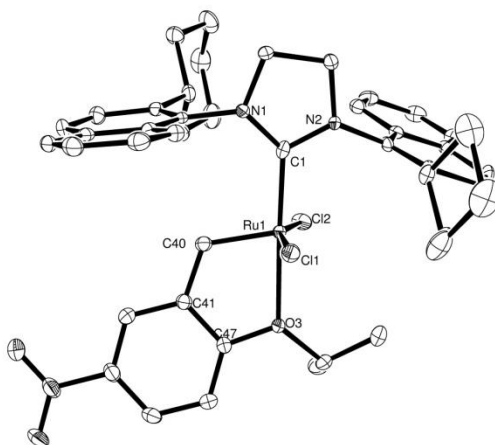

**Figure 2S.** Atomic Displacement Parameters (ADPs) and the labeling of atoms in **4d**. Thermal ellipsoids are shown at the 50% probability level. Hydrogen atoms omitted for clarity.

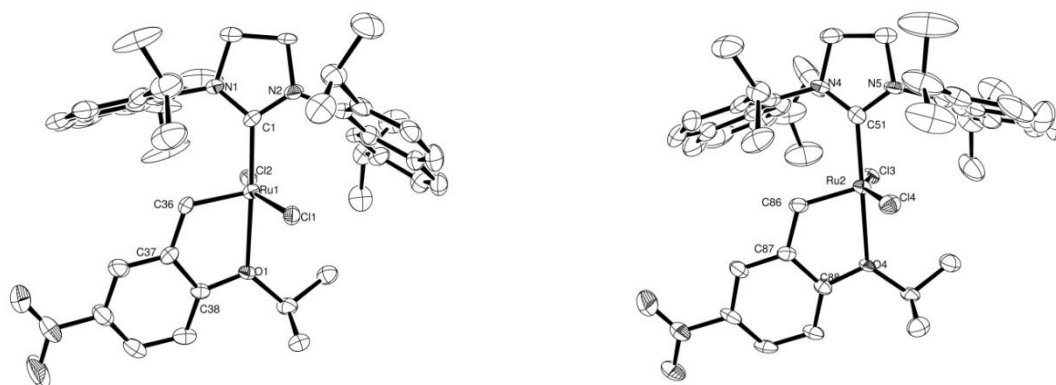

**Figure 3S.** Atomic Displacement Parameters (ADPs) and the labeling of atoms in **4e** for two molecules in asymmetric unit (**4e'** and **4e''**). Thermal ellipsoids are shown at the 50% probability level. Hydrogen atoms omitted for clarity.

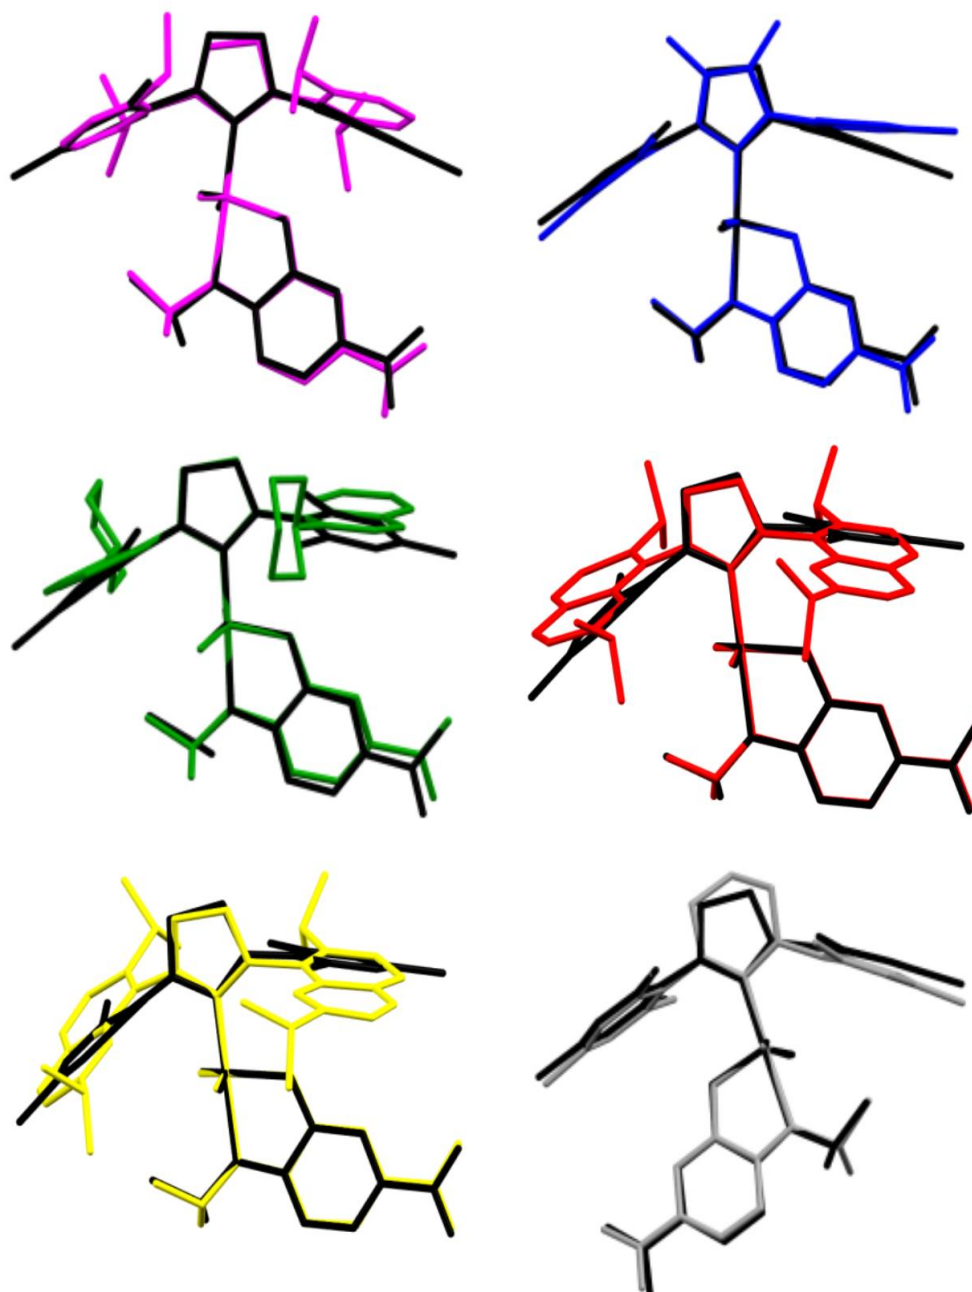

**Figure 4S.** Overlay of molecules from the **4a** structure (black) with the **4b** (magenta), **4c** structure (blue), **4d** structure (green), **4f** structure (grey), **4e'** structure (red) and **4e''** (yellow) and **4g** (grey).

The **CuClCy<sub>3</sub>** molecules (Figure 5S) crystallize in the triclinic P-1 space group with half of the molecule in the asymmetric unit. The crystal structure of the complex was previously determined.<sup>9</sup> Each copper(I) atom is in trigonal coordination to a tricyclohexylphosphine ligand and two bridging chloride ligands. The bond distance between Cu-Cl1, Cu-Cl1<sup>i</sup> and Cu-P1 is 2.3239(7) Å, 2.2931(5) Å and 2.1853(6), respectively. The Cu1<sup>i</sup>-Cl1<sup>i</sup>-Cu1 angle between is 83.57(5)° making the central ring a rhomboid. The *i* superscript stands for the symmetry operations 1-x, -y, -z.

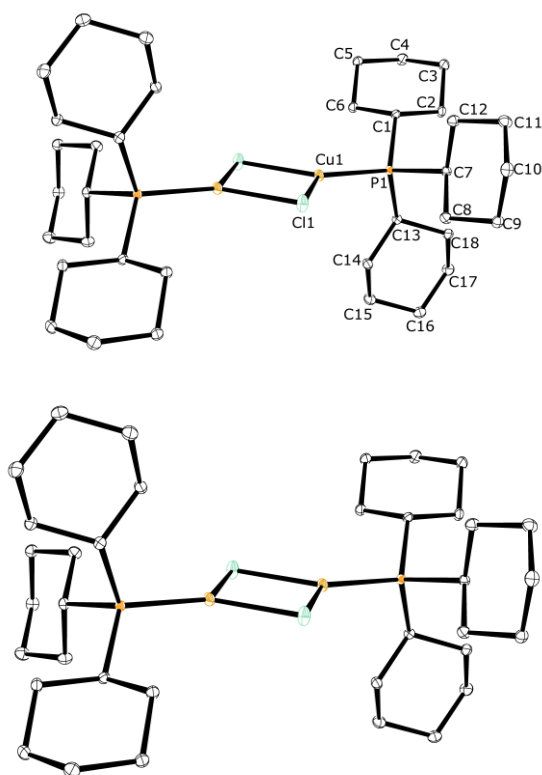

**Figure 5S.** Atomic Displacement Parameters (ADPs) and the labeling of atoms in **CuCIPCy<sub>3</sub>**. Thermal ellipsoids are shown at the 50% probability level. Hydrogen atoms omitted for clarity.

**Table 2S. Experimental details for the CuCIPCy<sub>3</sub> measurement.**

| CuCIPCy <sub>3</sub>               |                                                                                 |
|------------------------------------|---------------------------------------------------------------------------------|
| <b>Crystal data</b>                |                                                                                 |
| Chemical formula                   | C <sub>36</sub> H <sub>66</sub> Cl <sub>2</sub> Cu <sub>2</sub> P <sub>2</sub>  |
| <i>M<sub>r</sub></i>               | 758.86                                                                          |
| Crystal system, space group        | Triclinic, <i>P</i> <sup>-</sup> 1                                              |
| Temperature (K)                    | 100                                                                             |
| <i>a</i> , <i>b</i> , <i>c</i> (Å) | 8.3261 (6), 9.1977 (6), 13.2086 (9)                                             |
| α, β, γ (°)                        | 100.199 (2), 90.976 (2), 113.213 (2)                                            |
| <i>V</i> (Å <sup>3</sup> )         | 910.73 (11)                                                                     |
| <i>Z</i>                           | 1                                                                               |
| Radiation type                     | Mo <i>K</i> α                                                                   |
| μ (mm <sup>-1</sup> )              | 1.43                                                                            |
| Crystal size (mm)                  | 0.3 × 0.3 × 0.2                                                                 |
| <b>Data collection</b>             |                                                                                 |
| Diffractometer                     | Bruker Apex2 Ultra                                                              |
| Absorption correction              | Multi-scan<br>SADABS2008/1 - Bruker Nonius area detector scaling and absorption |

|                                                                            |                               |
|----------------------------------------------------------------------------|-------------------------------|
|                                                                            | correction                    |
| $T_{\min}, T_{\max}$                                                       | 0.92, 0.98                    |
| No. of measured, independent and observed [ $I > 2\sigma(I)$ ] reflections | 7559, 3870, 3420              |
| $R_{\text{int}}$                                                           | 0.022                         |
| $(\sin \theta/\lambda)_{\text{max}} (\text{\AA}^{-1})$                     | 0.642                         |
| Refinement                                                                 |                               |
| $R[F^2 > 2\sigma(F^2)], wR(F^2), S$                                        | 0.032, 0.085, 1.06            |
| No. of reflections                                                         | 3870                          |
| No. of parameters                                                          | 190                           |
| H-atom treatment                                                           | H-atom parameters constrained |
| $\Delta\rho_{\text{max}}, \Delta\rho_{\text{min}} (\text{e \AA}^{-3})$     | 0.55, -0.26                   |

Computer programs: *SHELXL97* (Sheldrick, 1997).

# NMR spectra

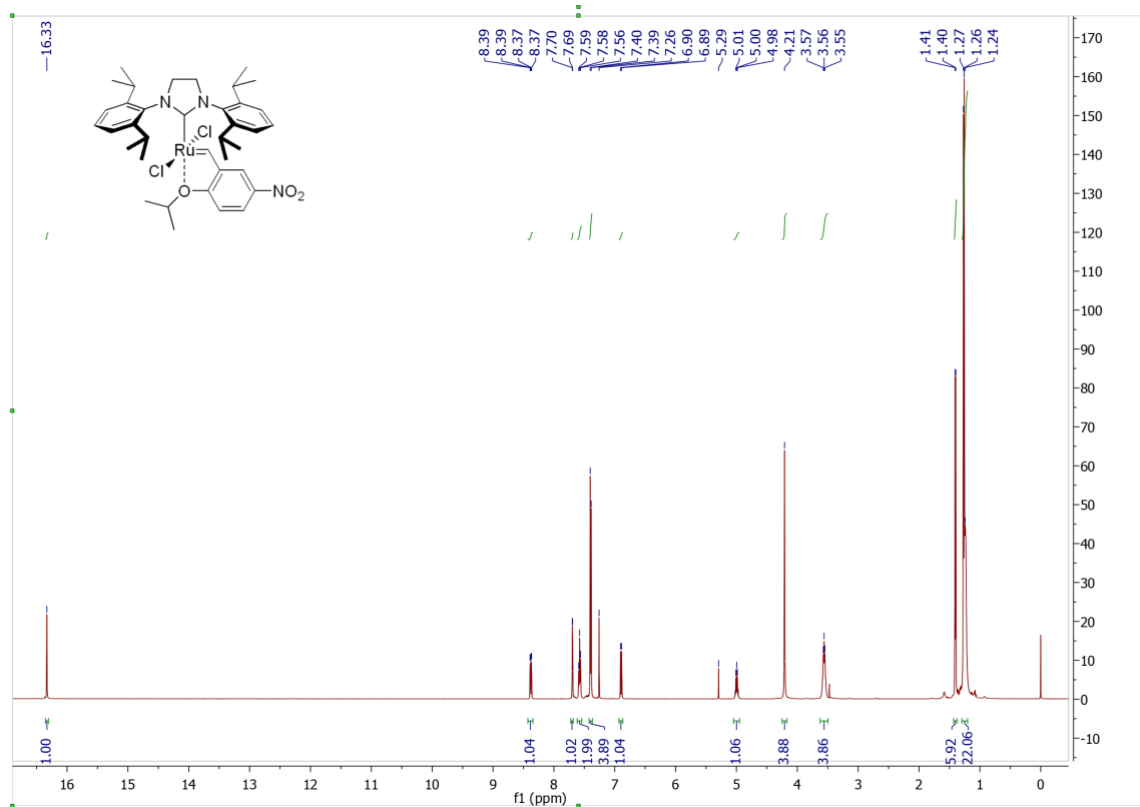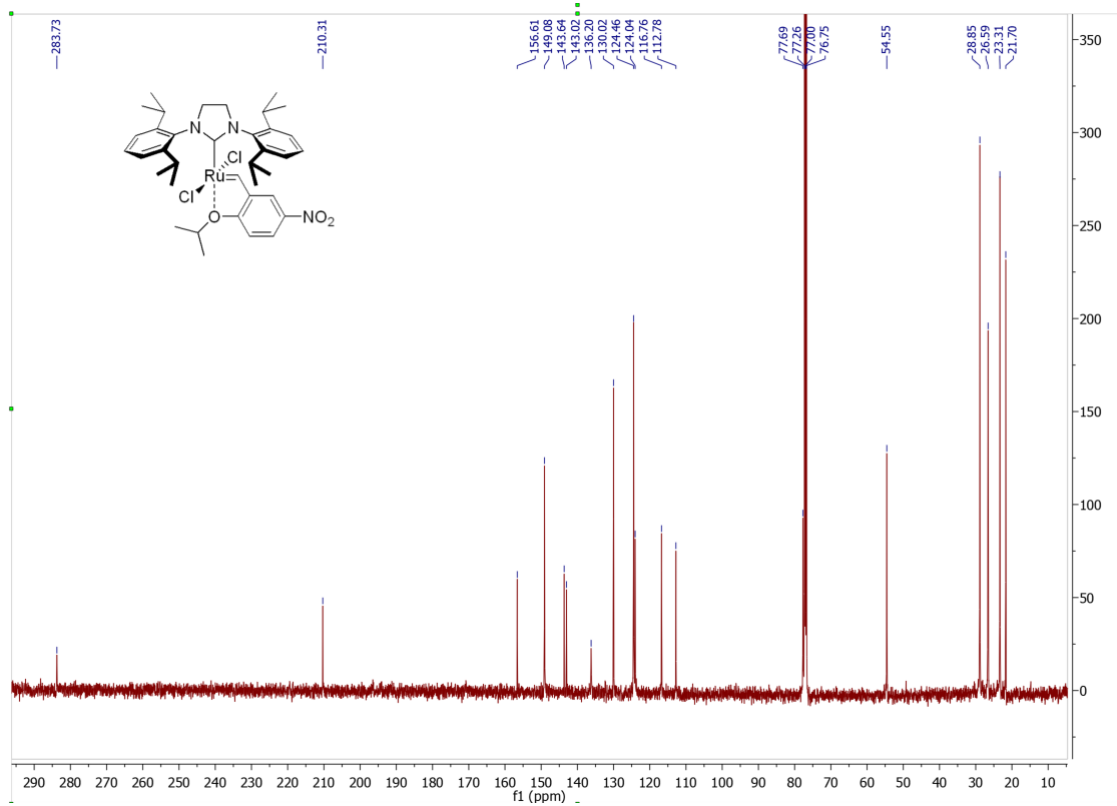

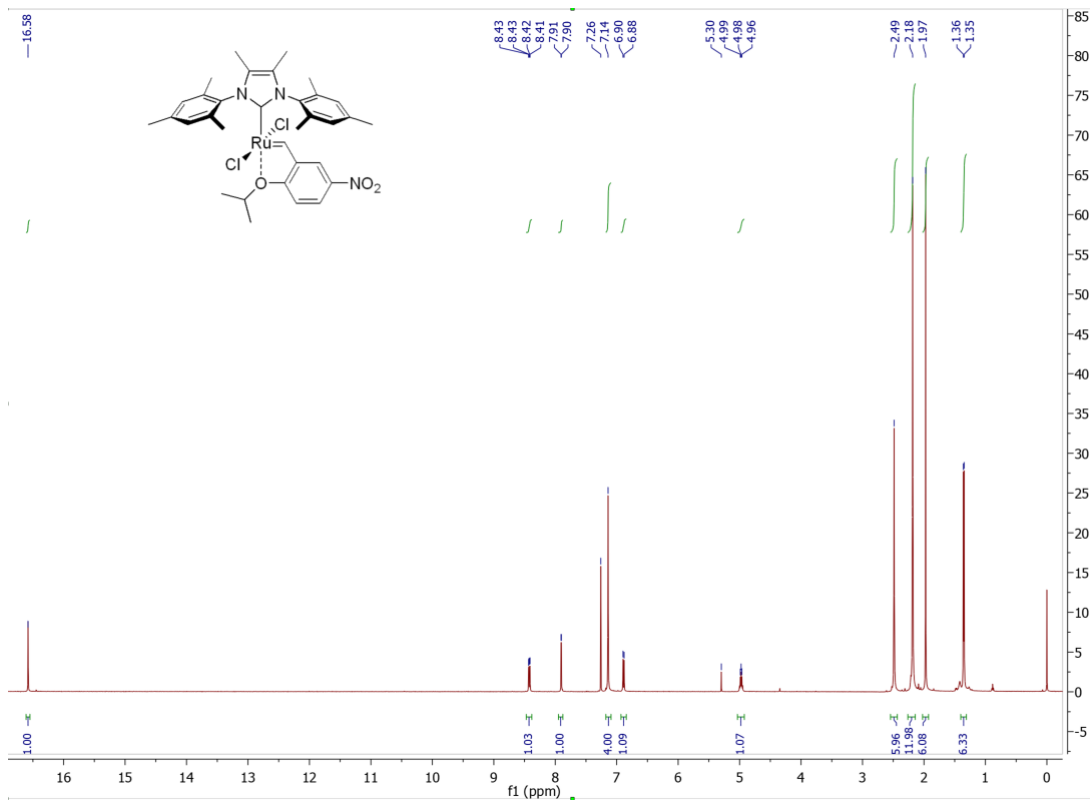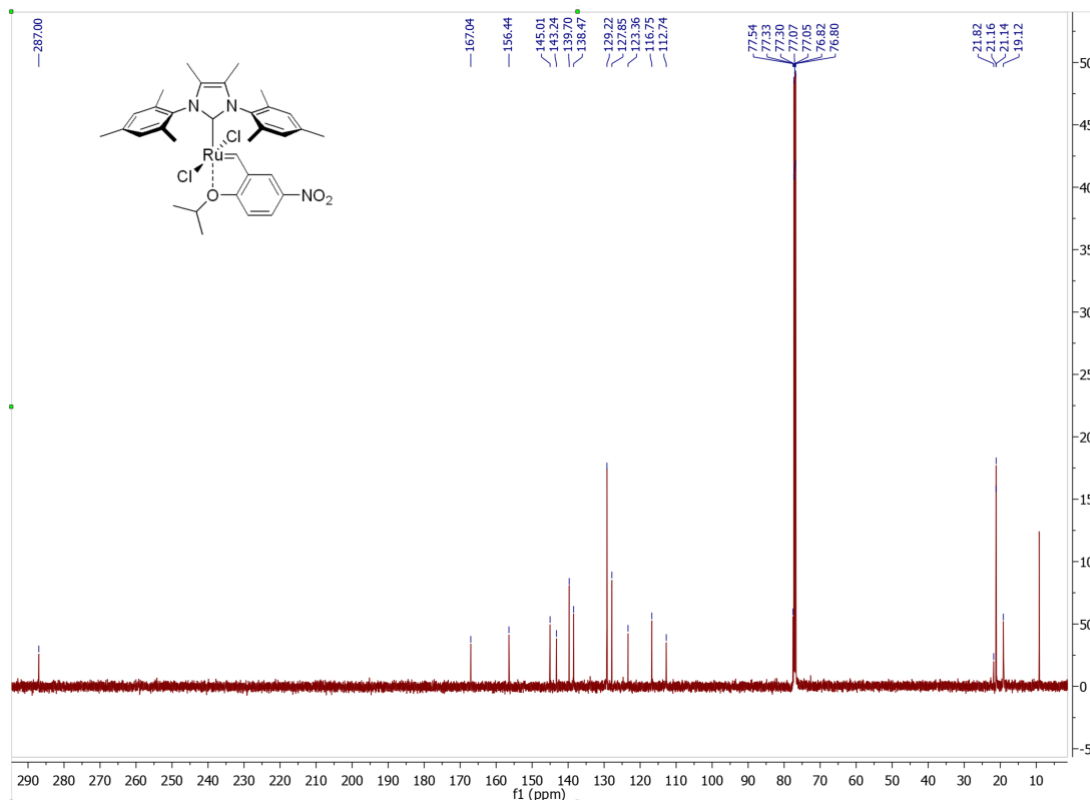



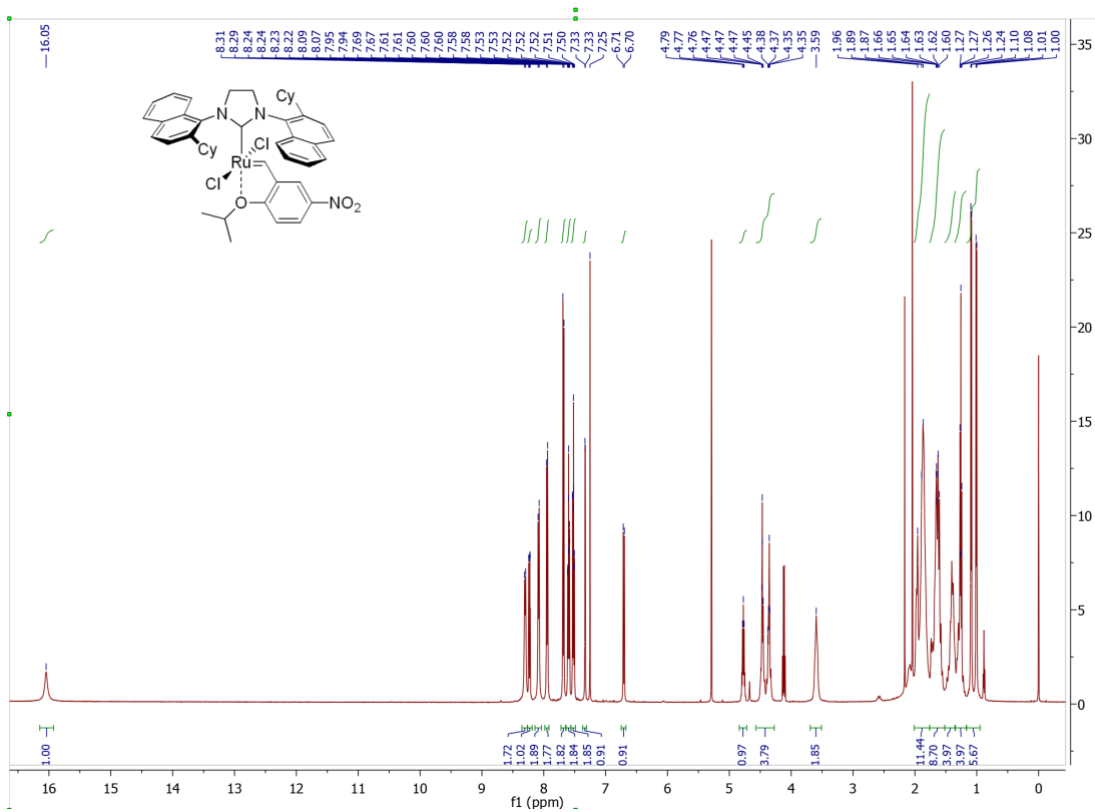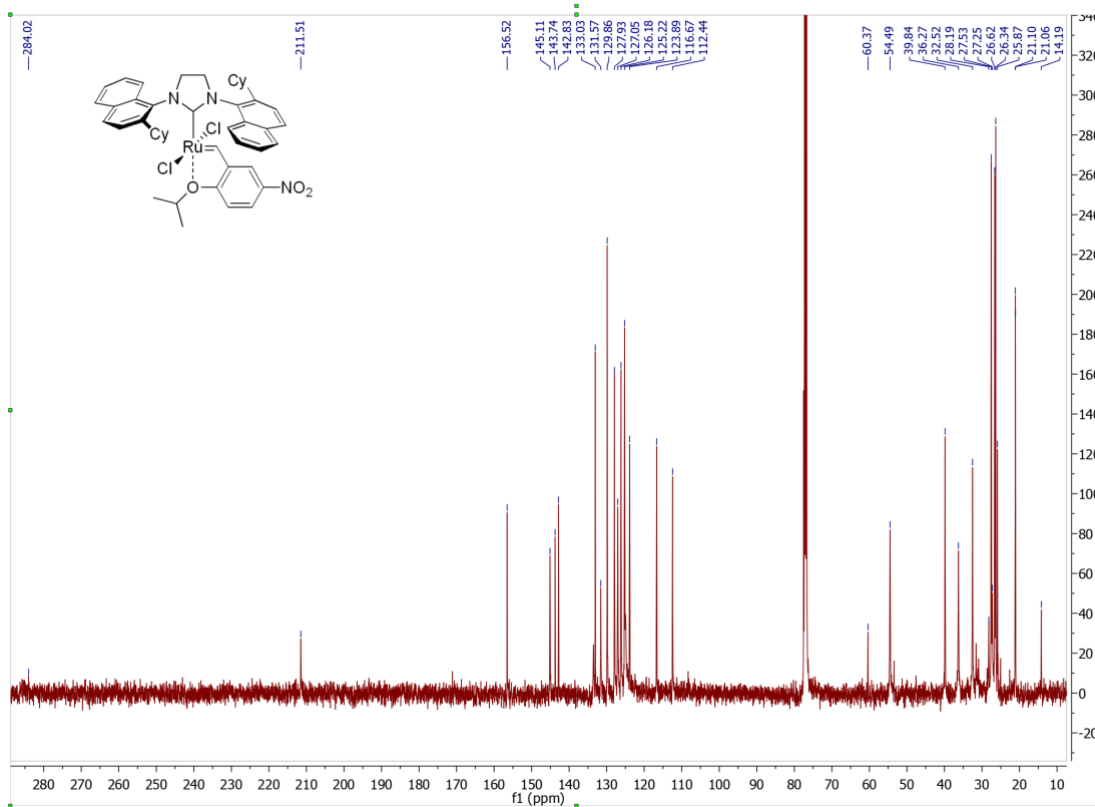

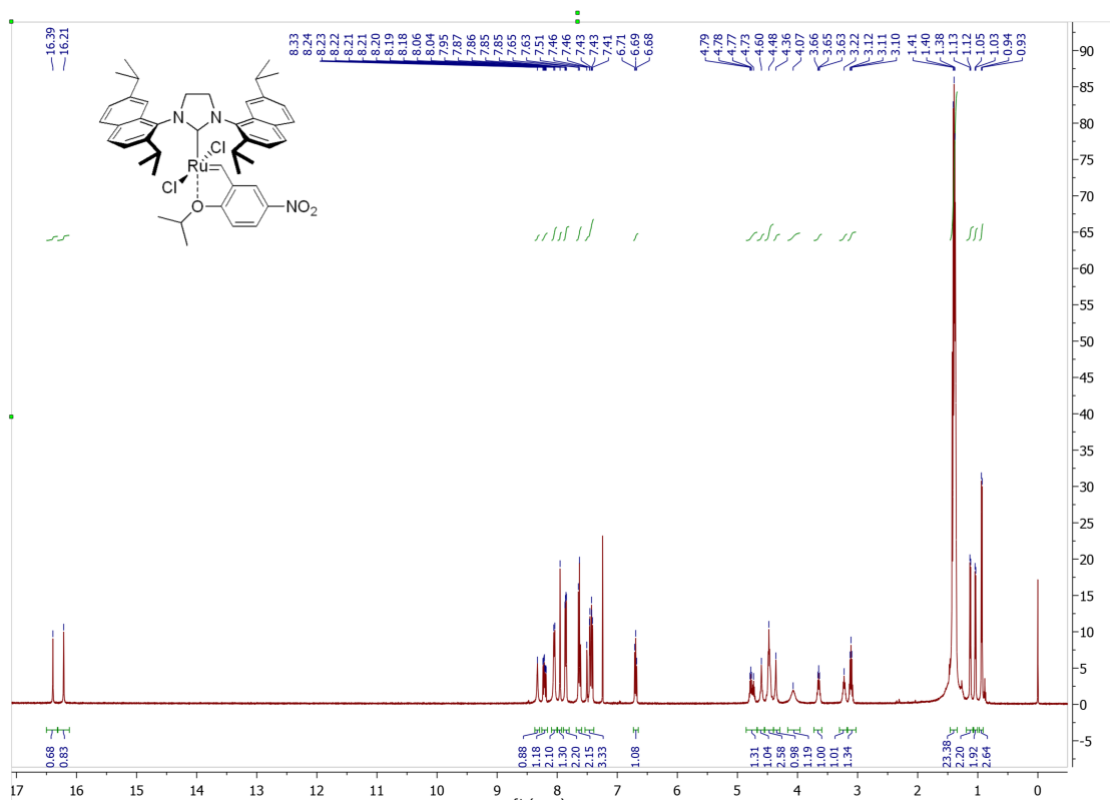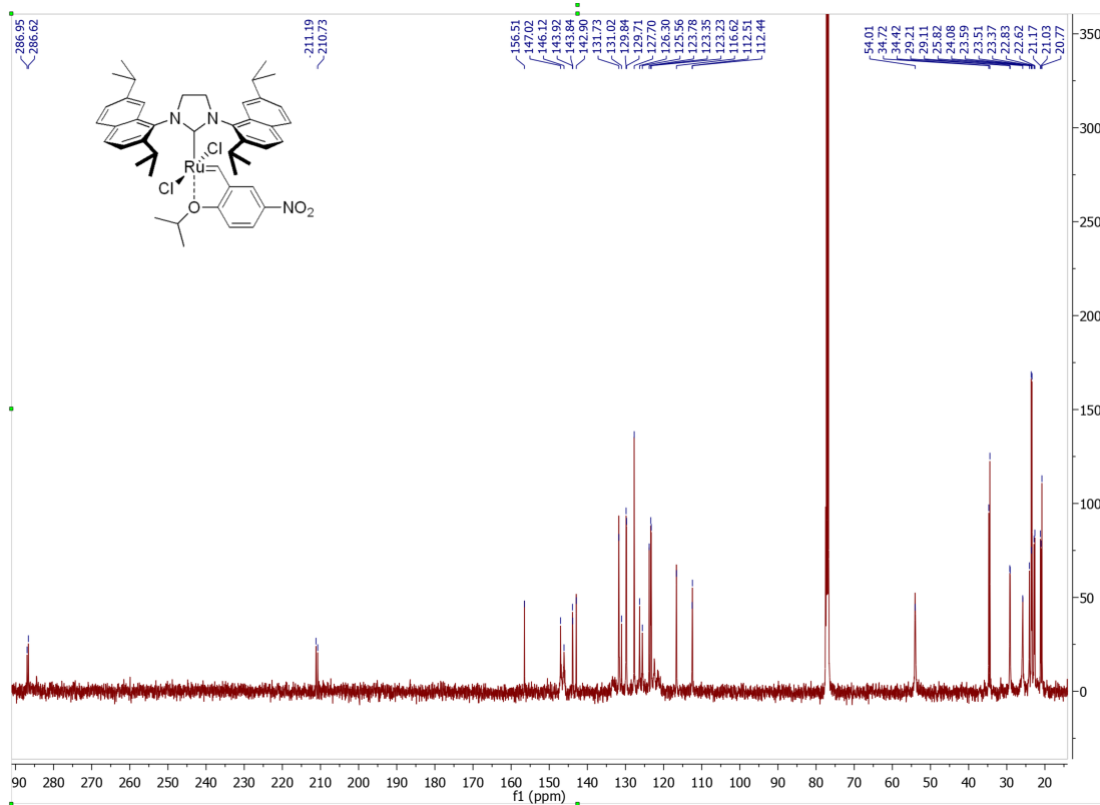

## References

---

- <sup>1</sup> a) Y. Kobayashi, S. Inukai, N. Kondo, T. Watanabe, Y. Sugiyama, H. Hamamoto, T. Shioiri, M. Matsugi, *Tetrahedron Lett.* **2015**, *56*, 1363-1366; b) J. M. Berlin, K. Campbell, T. Ritter, T. W. Funk, A. Chlenov, R. H. Grubbs, *Org. Lett.* **2007**, *9*, 1339-1342; c) H. Clavier, S. P. Nolan, *Chem. Eur. J.* **2007**, *13*, 8029-8036; d) T. E. Schmid, X. Bantreil, C. A. Citadelle, A. M. Z. Slawin, C. S. J. Cazin, *Chem. Commun.* **2011**, *47*, 7060-7062.
- <sup>2</sup> D. F. Taber, K. J. Frankowski, *The Journal of Organic Chemistry* **2003**, *68*, 6047-6048.
- <sup>3</sup> H. Clavier, S. P. Nolan, *Chemistry – A European Journal* **2007**, *13*, 8029-8036.
- <sup>4</sup> J. Wappel, C. A. Urbina-Blanco, M. Abbas, J. H. Albering, R. Saf, S. P. Nolan, C. Slugovc, *Beilstein Journal of Organic Chemistry* **2010**, *6*, 1091-1098.
- <sup>5</sup> G. M. Sheldrick, *Acta Cryst. A* **2008**, *64*, 112–122.
- <sup>6</sup> A. L. Spek, *Acta Cryst. D* **2009**, *65*, 148–155.
- <sup>7</sup> A. L. Spek, *Acta Cryst. C*, **2015**, *71*, 9–18.
- <sup>8</sup> A. J. C. Wilson, *International Tables for Crystallography*, Kluwer: Dordrecht, **1992**.
- <sup>9</sup> M. R. Churchill, F. J. Rotella, *Inorg. Chem.* **1979**, *18*, 166–171.
